# Supplementary material for: Prevalence and characteristics of pks genotoxin gene cluster-positive clinical Klebsiella pneumoniae isolates in Taiwan
Source: PubMed Central journal article supplement (PMC5324043; doi:10.1038/srep43120), 2017-02-24
Supplement: srep43120-s1.pdf [file srep43120-s1.pdf]

**Prevalence and characteristics of *pks* genotoxin gene cluster-positive clinical *Klebsiella pneumoniae* isolates in Taiwan**

Ying-Tsong Chen, Yi-Chyi Lai, Mei-Chen Tan, Li-Yun Hsieh, Jann-Tay Wang, Yih-Ru Shiau, Hui-Ying Wang, Ann-Chi Lin, Jui-Fen Lai, I-Wen Huang, Tsai-Ling Lauderdale

Table S1. PCR primers used for studying the *pks* status, hypervirulence, and capsular type of *Klebsiella pneumoniae* isolates.

| Target           | Primers   | Nucleotide sequence (5' - 3') | Reference       |
|------------------|-----------|-------------------------------|-----------------|
| <i>pks(clbB)</i> | clbBF     | GATTTGGATACTGGCGATAACCG       | Nougayrede 2006 |
|                  | clbBR     | CCATTTCCCGTTTGAGCACAC         |                 |
| <i>pks(clbN)</i> | clbNF     | GTTTTGCTCGCCAGATAGTCATTC      | Nougayrede 2006 |
|                  | clbNR     | CAGTTCGGGTATGTGTGGAAGG        |                 |
| <i>pks(clbA)</i> | clbAF     | CTAGATTATCCGTGGCGATTC         | Nougayrede 2006 |
|                  | clbAR     | CAGATACACAGATAACCATTCA        |                 |
| <i>pks(clbQ)</i> | clbQF     | CTTGTATAGTTACACAACACTATTC     | Nougayrede 2006 |
|                  | clbQR     | TTATCCTGTTAGCTTTCGTTTC        |                 |
| Aerobactin       | iutAF     | ACCTGGGTTATCGAAAACGC          | Tang 2010       |
|                  | iutAR     | GATGTCATAGCCTGATTGC           |                 |
| Yersiniabactin   | ybtAF     | ATGACGGAGTCACCGCAAAC          | Hsieh 2008      |
|                  | ybtAR     | TTACATCACGCGTTTAAAGG          |                 |
| <i>rmpA</i>      | rmpAF     | ACGACTTTCAAGAGAAATGA          | Tang 2010       |
|                  | rmpAR     | CATAGATGTCATAATCACAC          |                 |
| K1 capsular type | MagAF1    | GTAGGTATTGCAAGCCATGC          | Fang 2007       |
|                  | MagAR1    | GCCCAGGTTAATGAATCCGT          |                 |
| K2 capsular type | K2wzy-F1  | GGAGCCATTTGAATTCGGTG          | Fang 2007       |
|                  | K2wzy-R1  | TCC CTAGCACTGGCTTAAGT         |                 |
| K5 capsular type | K5wzxF360 | TGGTAGTGATGCTCGCGA            | Turton 2008     |
|                  | K5wzxR639 | CCTGAACCCACCCCAATC            |                 |

|                   |         |                                 |             |
|-------------------|---------|---------------------------------|-------------|
| K20 capsular type | wzyK20F | CGGTGCTACAGTGCATCATT            | Fang 2007   |
|                   | wzyK20R | GTTATACGATGCTCAGTCGC            |             |
| K54 capsular type | wzxK54F | CATTAGCTCAGTGGTTGGCT            | Fang 2007   |
|                   | wzxK54R | GCTTGACAAACACCATAGCAG           |             |
| K57 capsular type | wzyK57F | CTCAGGGCTAGAAGTGTCAT            | Fang 2007   |
|                   | wzyK57R | CACTAACCCAGAAAGTCGAG            |             |
| <i>wzi</i>        | wzi_F2  | GTGCCGCGAGCGCTTTCTATCTTGGTATTCC | Brisse 2013 |
|                   | wzi_rev | GAGAGCCACTGGTTCCAGAAYTTSACCGC   |             |

---

Y: C or T

S: C or G
